# Supplementary material for: MRI texture analysis Machine Learning models to assess graft interstitial fibrosis and tubular atrophy in patients with transplanted kidneys
Source: Preprints.org preprint supplement (doi:10.20944/preprints202408.0113.v1), 2024-08-02
Supplement: Supplementary file 1 [file supplementary]

**Supplementary material**

Supplementary Table 1

| **Sequence** | **T2 ssh** | | | **T1 3D GRE post contrast** | | |
| --- | --- | --- | --- | --- | --- | --- |
| **Parameter** | **Flip Angle** | **Repetition Time** | **Echo Time** | **Flip Angle** | **Repetition Time** | **Echo Time** |
| **Median (IQR)** | 90 (90-90) | 402,42 (397,20-409,55) | 100 (80-100) | 10 (10-10) | 4,04 (4,00-4,04) | 1,96 (1,92-1,96) |
| 1 | 90 | 350,00 | 90 | 10 | 4,37 | 2,09 |
| 2 | 90 | 402,08 | 100 | 10 | 4,04 | 1,96 |
| 3 | 90 | 410,59 | 100 | 10 | 4,04 | 1,96 |
| 4 | 90 | 297,20 | 100 | 10 | 4,04 | 1,96 |
| 5 | 90 | 397,20 | 100 | 10 | 3,80 | 1,81 |
| 6 | 90 | 434,26 | 80 | 10 | 4,20 | 2,03 |
| 7 | 90 | 397,20 | 100 | 10 | 4,04 | 1,96 |
| 8 | 90 | 402,30 | 100 | 10 | 4,03 | 1,96 |
| 9 | 90 | 399,71 | 100 | 10 | 4,03 | 1,96 |
| 10 | 90 | 404,89 | 100 | 10 | 4,04 | 1,96 |
| 11 | 90 | 397,20 | 100 | 10 | 3,81 | 1,85 |
| 12 | 90 | 525,72 | 80 | 10 | 4,04 | 1,96 |
| 13 | 90 | 397,20 | 100 | 10 | 3,76 | 1,79 |
| 14 | 90 | 453,56 | 80 | 10 | 4,04 | 1,96 |
| 15 | 90 | 417,25 | 80 | 10 | 4,03 | 1,95 |
| 16 | 90 | 397,20 | 100 | 10 | 4,04 | 1,96 |
| 17 | 90 | 404,39 | 100 | 10 | 4,02 | 1,94 |
| 18 | 90 | 404,39 | 100 | 10 | 4,02 | 1,94 |
| 19 | 90 | 404,39 | 100 | 10 | 4,04 | 1,96 |
| 20 | 90 | 404,54 | 100 | 10 | 4,04 | 1,96 |
| 21 | 90 | 397,20 | 100 | 10 | 4,04 | 1,96 |
| 22 | 90 | 397,20 | 100 | 10 | 4,04 | 1,96 |
| 23 | 90 | 397,20 | 100 | 10 | 3,81 | 1,85 |
| 24 | 90 | 406,41 | 100 | 10 | 3,73 | 1,77 |
| 25 | 90 | 399,66 | 100 | 10 | 4,05 | 1,96 |
| 26 | 90 | 397,20 | 100 | 10 | 4,04 | 1,95 |
| 27 | 90 | 397,20 | 100 | 10 | 4,04 | 1,96 |
| 28 | 90 | 397,20 | 100 | 10 | 4,02 | 1,94 |
| 29 | 90 | 402,08 | 100 | 10 | 4,04 | 1,96 |
| 30 | 90 | 397,20 | 100 | 10 | 4,04 | 1,95 |
| 31 | 90 | 404,39 | 100 | 10 | 4,04 | 1,96 |
| 32 | 90 | 405,16 | 80 | 10 | 3,8 | 1,83 |
| 33 | 90 | 405,16 | 80 | 10 | 3,8 | 1,83 |
| 34 | 90 | 404,39 | 100 | 10 | 4,00 | 1,92 |
| 35 | 90 | 410,59 | 100 | 10 | 3,77 | 1,79 |
| 36 | 90 | 404,39 | 100 | 10 | 3,62 | 1,74 |
| 37 | 90 | 396,82 | 100 | 10 | 4,03 | 1,95 |
| 38 | 90 | 402,54 | 100 | 10 | 4,05 | 1,96 |
| 39 | 90 | 397,2 | 100 | 10 | 4,04 | 1,96 |
| 40 | 90 | 399,72 | 100 | 10 | 4,04 | 1,96 |
| 41 | 90 | 404,89 | 100 | 10 | 4,04 | 1,96 |
| 42 | 90 | 421,99 | 100 | 10 | 4,04 | 1,96 |
| 43 | 90 | 429,35 | 80 | 10 | 4,04 | 1,96 |
| 44 | 90 | 392 | 80 | 10 | 3,76 | 1,8 |
| 45 | 90 | 397,2 | 100 | 10 | 4,04 | 1,96 |
| 46 | 90 | 397,2 | 100 | 10 | 4,05 | 1,96 |
| 47 | 90 | 399,71 | 100 | 10 | 4 | 1,92 |
| 48 | 90 | 453,56 | 80 | 10 | 3,75 | 1,79 |
| 49 | 90 | 399,72 | 100 | 10 | 4,04 | 1,96 |
| 50 | 90 | 385,27 | 80 | 10 | 4,04 | 1,96 |
| 51 | 90 | 397,2 | 100 | 10 | 4,04 | 1,96 |
| 52 | 90 | 405,16 | 80 | 10 | 4,04 | 1,96 |
| 53 | 90 | 404,39 | 100 | 10 | 4,04 | 1,96 |
| 54 | 90 | 402,08 | 100 | 10 | 4 | 1,92 |
| 55 | 90 | 461,87 | 80 | 10 | 4,04 | 1,96 |
| 56 | 90 | 508,02 | 80 | 10 | 3,79 | 1,83 |
| 57 | 90 | 447,51 | 80 | 10 | 3,85 | 1,87 |
| 58 | 90 | 410,59 | 100 | 10 | 4,02 | 1,94 |
| 59 | 90 | 416,29 | 100 | 10 | 4,04 | 1,96 |
| 60 | 90 | 399,1 | 80 | 10 | 4,03 | 1,94 |
| 61 | 90 | 397,2 | 100 | 10 | 3,85 | 1,83 |
| 62 | 90 | 392 | 80 | 10 | 3,76 | 1,8 |
| 63 | 90 | 399,66 | 100 | 10 | 4,05 | 1,96 |
| 64 | 90 | 397,2 | 100 | 10 | 3,8 | 1,81 |
| 65 | 90 | 410,59 | 100 | 10 | 4,02 | 1,94 |
| 66 | 90 | 429,35 | 80 | 10 | 4,04 | 1,96 |
| 67 | 90 | 429,35 | 80 | 10 | 4,04 | 1,96 |
| 68 | 90 | 404,54 | 100 | 10 | 4,04 | 1,96 |
| 69 | 90 | 429,35 | 80 | 10 | 4,04 | 1,96 |
| 70 | 90 | 404,39 | 100 | 10 | 4,04 | 1,96 |

Supplementary table 1: Acquisition parameters of every included study.

Supplementary Table 2:

|  | Kendall’s Tau (τ) | P value |
| --- | --- | --- |
| Patient age at biopsy | 0.12 | 0.18 |
| Transplant age | 0.44 | <0.0001 |
| Transplant type | -0.03 | 0.81 |
| eGFR at biopsy | -0.11 | 0.19 |
| Proteinuria/creatininuria | 0.23 | 0.01 |

Supplementary table 2: Associations between clinical variables and IFTA as a continuous variable computed using Kendall’s Tau correlation coefficient/Spearman for transplant type variable; higher absolute value of τ corresponds to higher correlation between variables and outcome.

Supplementary Figure 1:


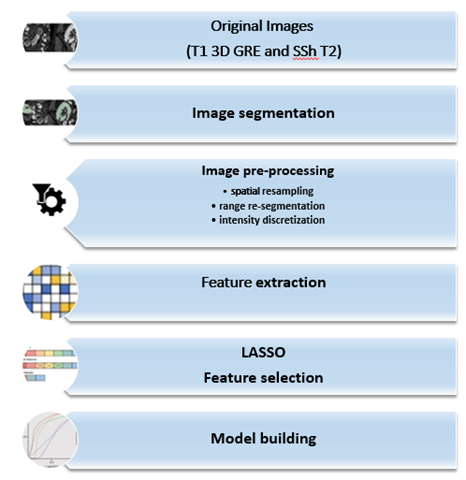


Supplementary figure 1. Radiomic pipeline followed in our study.
